# Supplementary material for: Drastic improvement in detection limits in energy dispersive X-ray fluorescence geometry utilizing micro-focused bremsstrahlung excitation in thin-film sample specimen
Source: Royal Society of Chemistry journal article supplement (doi:10.1039/d0ja00499e), 2021-01-01
Supplement: d0ja00499e1.pdf [file d0ja00499e1.pdf]

## Supplementary Information

### Drastic Improvement of Detection Limits in Energy Dispersive X-Ray Fluorescence Geometry Utilizing Micro-Focused Bremsstrahlung Excitation in Thin Film Sample Specimen

Kaushik Sanyal<sup>1,2</sup>, Buddhadev Kanrar<sup>1,2,\*</sup> and Sangita Dhara<sup>1,2</sup>

<sup>1</sup>Fuel Chemistry Division, Bhabha Atomic Research Centre, Mumbai, 400085

<sup>2</sup>Homi Bhabha National Institute, Anushaktinagar, Mumbai, 400094

**Table S1** Validation of the developed  $\mu$ -XRF based technique for MERCK ICP MES standard solution having elemental concentration in the ultra trace level ranging from 5-100 ng/mL (n=3,

1 $\sigma$ )

| Elements | Expected conc. ng/mL | $\mu$ -XRF determined conc. (ng/mL) | Expected conc. ng/mL | $\mu$ -XRF determined conc. (ng/mL) | Expected conc. ng/mL | $\mu$ -XRF determined conc. (ng/mL) |
|----------|----------------------|-------------------------------------|----------------------|-------------------------------------|----------------------|-------------------------------------|
| Cr       | 5                    | 5.1 $\pm$ 0.1                       | 50                   | 47.5 $\pm$ 0.1                      | 100                  | 101 $\pm$ 2                         |
| Mn       | 5                    | 4.62 $\pm$ 0.04                     | 50                   | 50.2 $\pm$ 0.1                      | 100                  | 116 $\pm$ 4                         |
| Fe       | 5                    | 5.5 $\pm$ 0.3                       | 50                   | 52.2 $\pm$ 0.8                      | 100                  | 101 $\pm$ 2                         |
| Co       | 5                    | 4.9 $\pm$ 0.2                       | 50                   | 48.9 $\pm$ 0.6                      | 100                  | 104 $\pm$ 4                         |
| Ni       | 5                    | 6.1 $\pm$ 0.1                       | 50                   | 50.3 $\pm$ 0.6                      | 100                  | 102 $\pm$ 2                         |
| Cu       | 5                    | 5.2 $\pm$ 0.2                       | 50                   | 53.1 $\pm$ 0.3                      | 100                  | 103 $\pm$ 2                         |
| Zn       | 5                    | 5.6 $\pm$ 0.1                       | 50                   | 64.5 $\pm$ 0.5                      | 100                  | 99 $\pm$ 3                          |
| Sr       | 5                    | 5.4 $\pm$ 0.2                       | 50                   | 48.2 $\pm$ 0.9                      | 100                  | 97 $\pm$ 7                          |
| Ba       | 5                    | 5.3 $\pm$ 0.3                       | 50                   | 67 $\pm$ 2                          | 100                  | 138 $\pm$ 5                         |
| Tl       | 5                    | -                                   | 50                   | 44 $\pm$ 2                          | 100                  | 97 $\pm$ 3                          |
| Pb       | 5                    | -                                   | 50                   | 50 $\pm$ 4                          | 100                  | 116 $\pm$ 5                         |
| Bi       | 5                    | -                                   | 50                   | 39 $\pm$ 1                          | 100                  | 123 $\pm$ 4                         |
